# Supplementary material
Source: ML conference proceedings conference paper supplement (https://openreview.net/forum?id=VMAgvbBBts)
Supplement: supplementary_material [file attachment]

# *UP-DP: Unsupervised Prompt Learning for Data Pre-Selection with Vision-Language Models*

*Submitted to 37th Conference on Neural Information Processing Systems*

*Submission ID # 14432*

# Two Lines of Data Efficiency Learning

## Semi-supervised learning (SSL)

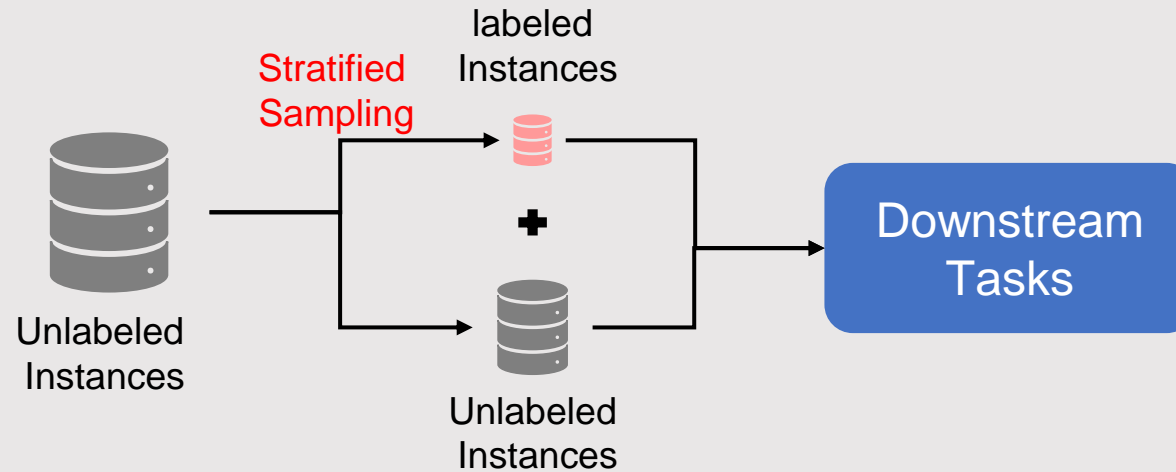

### **Semi-supervised learning (SSL) [1]:**

- Relies on invalid assumption of **stratified sampling**  
(Require equal sampling from each class)

# Two Lines of Data Efficiency Learning

## Active Learning (AL)

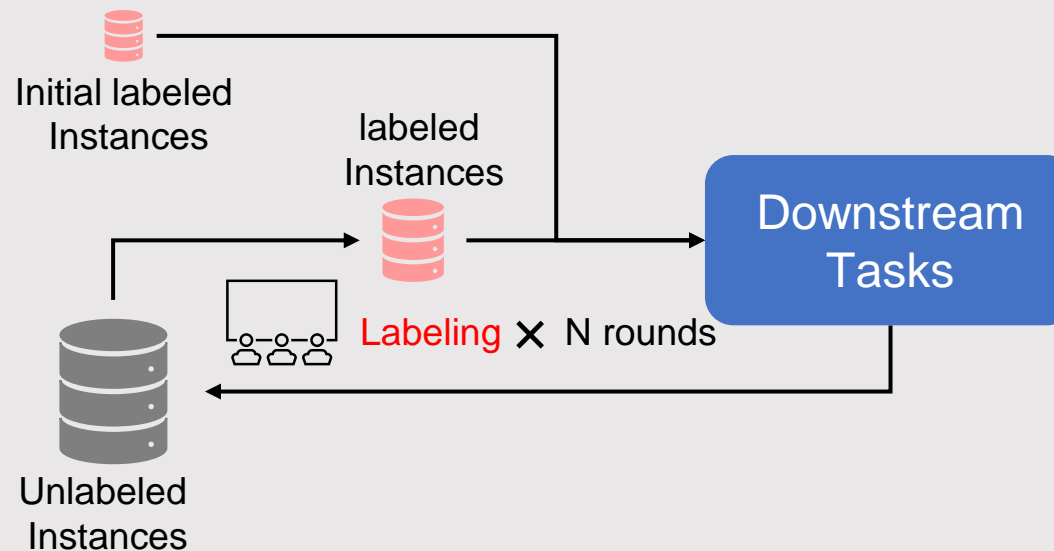

### Active Learning (AL) [2]:

- + avoid of stratified sampling
- require an initial labeled set
- requires **multiple rounds** of training and labeling
- selected instances are task specific

# Our approach: Data Pre-Selection

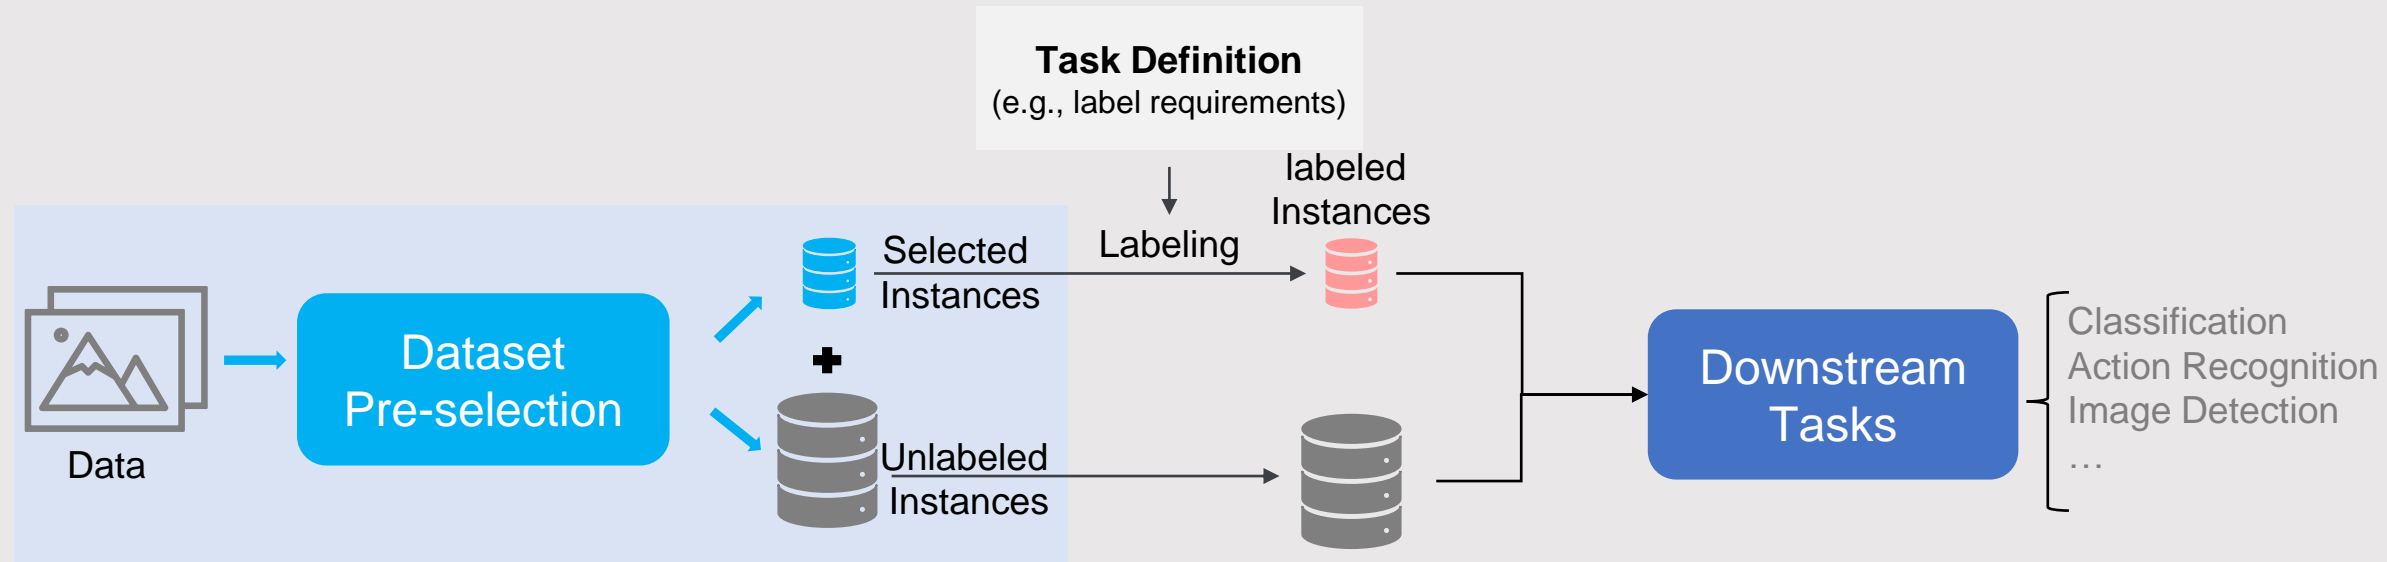

## Data Pre-Selection (new task):

- + avoid of stratified sampling
- + no initial labeled set
- + a single pass
- + fit for various **unknown** tasks

# The Core Idea:

Select **diverse** and **representative** instances based on semantically meaningful multimodal feature from **adapted** BLIP-2 [3].

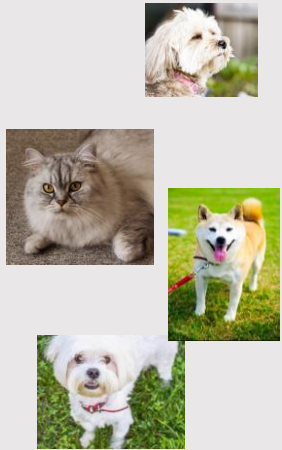

OxfordPets  
Dataset

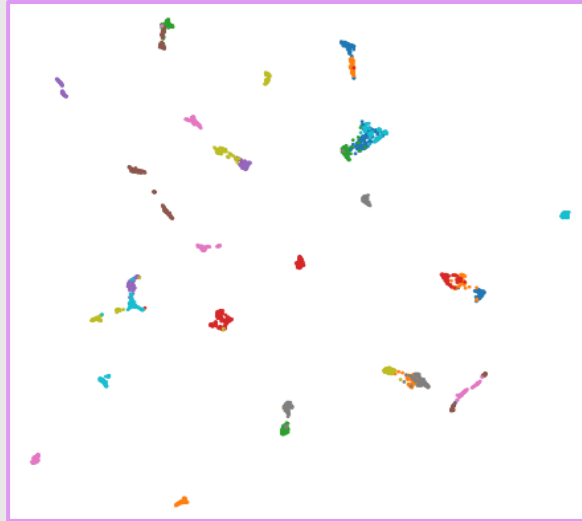

Multimodal Feature From BLIP-2  
with **Learned** Prompt

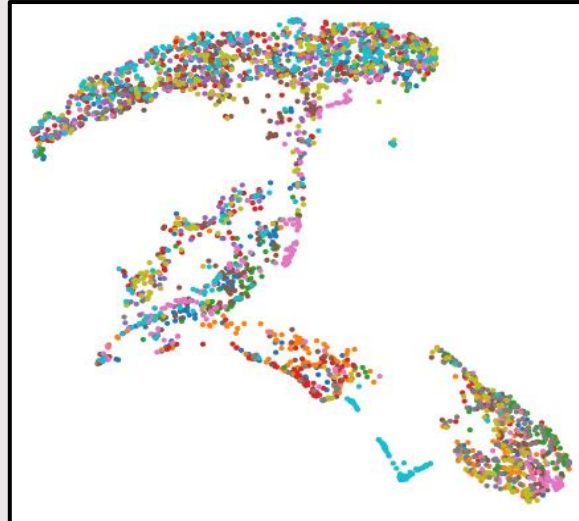

Multimodal Feature  
with Random Prompt

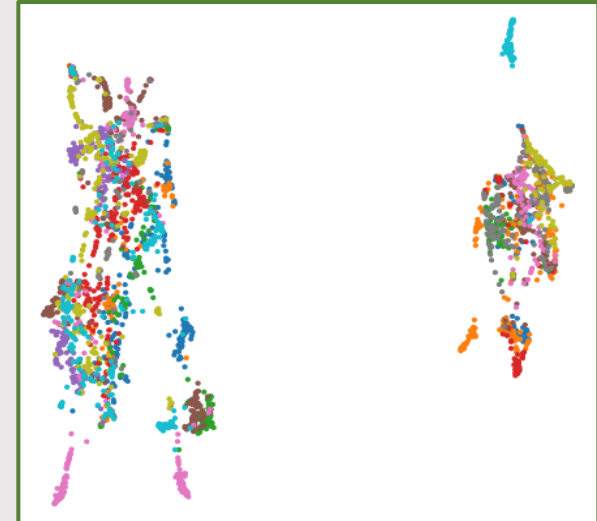

Image Feature Only

# Data Pre-selection Workflow

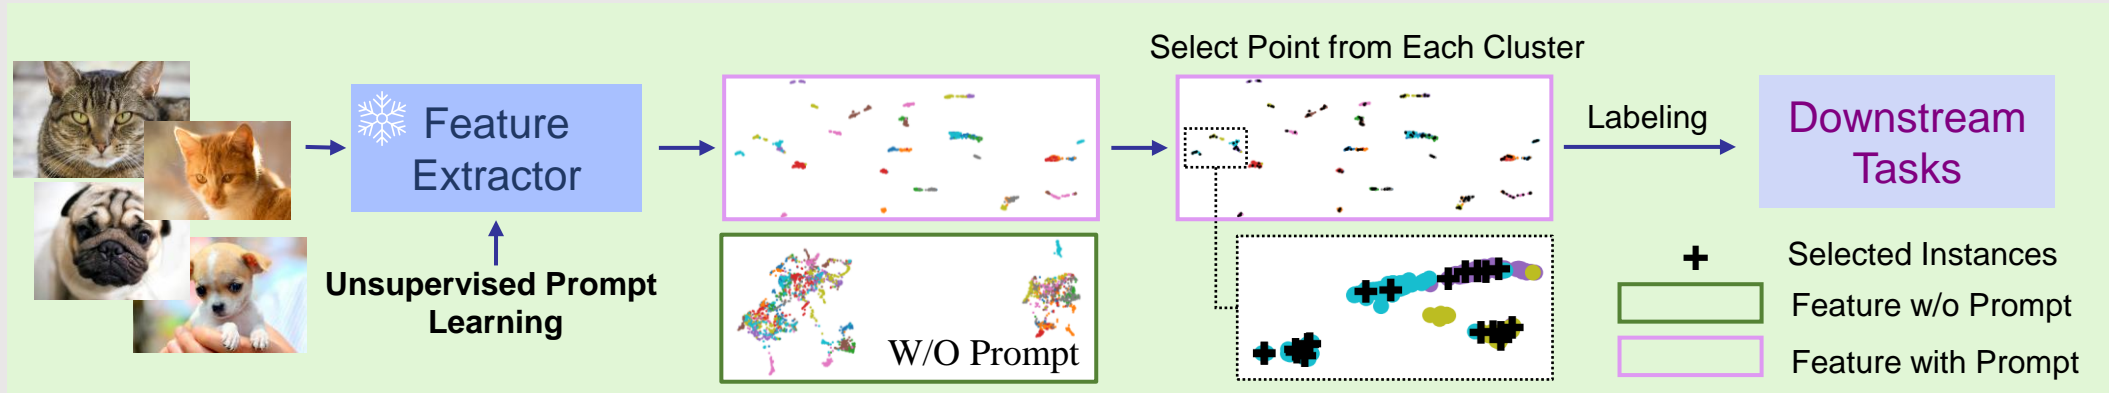

- ☐ Extract multimodal features for clustering
- ☐ Select representative and diverse instances for labeling
  - Medoid in each cluster
  - Instance with highest probability in each cluster

# Unsupervised Prompt Learning

## Adapt BLIP-2 for Data Pre-selection

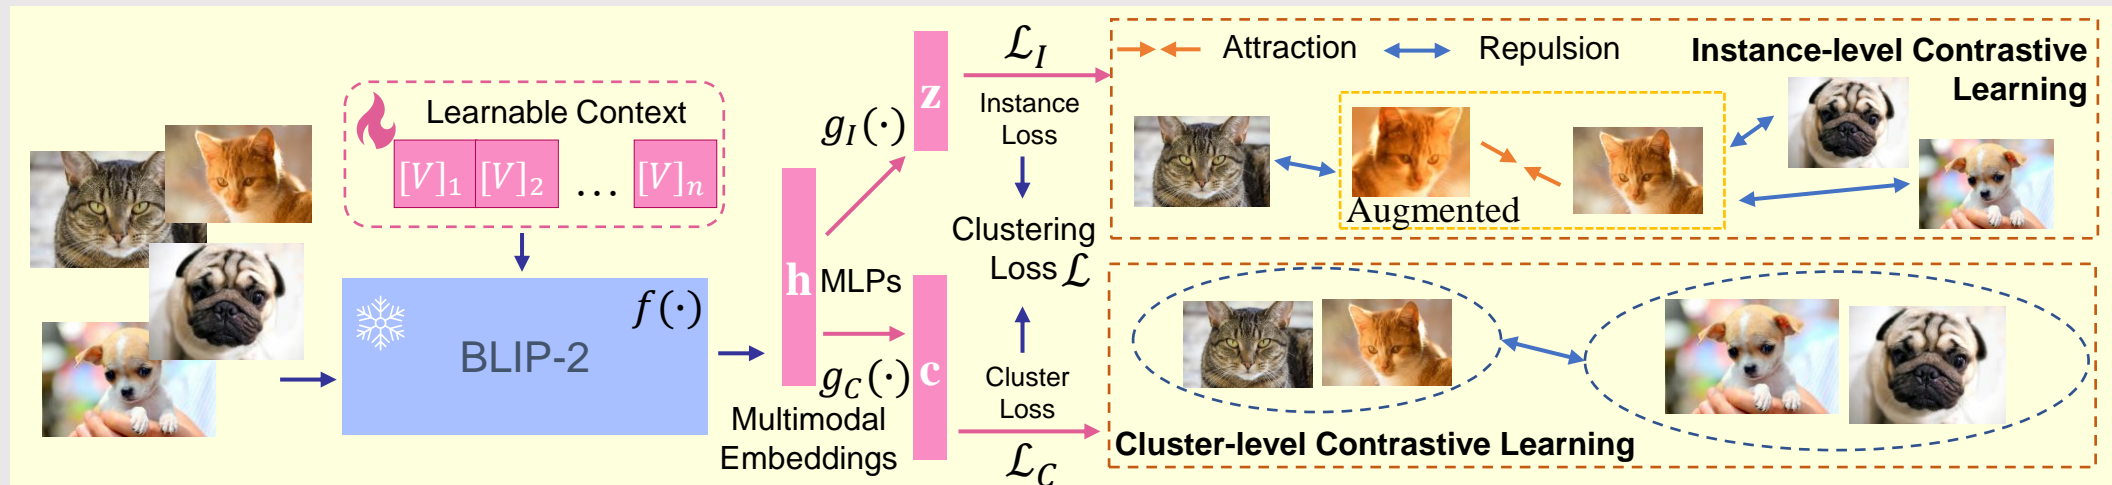

- ❑ Three cooperatively learned elements
  - Learnable prompts
  - Instance-level MLP head  $g_I(\cdot)$
  - Cluster-level MLP head  $g_C(\cdot)$
- ❑ Unsupervised clustering objectives [4]
  - Instance-level contrastive loss
  - Cluster-level contrastive loss

# Prompt Generalization across Other Datasets

## (c) Prompt Generalization for Other Datasets

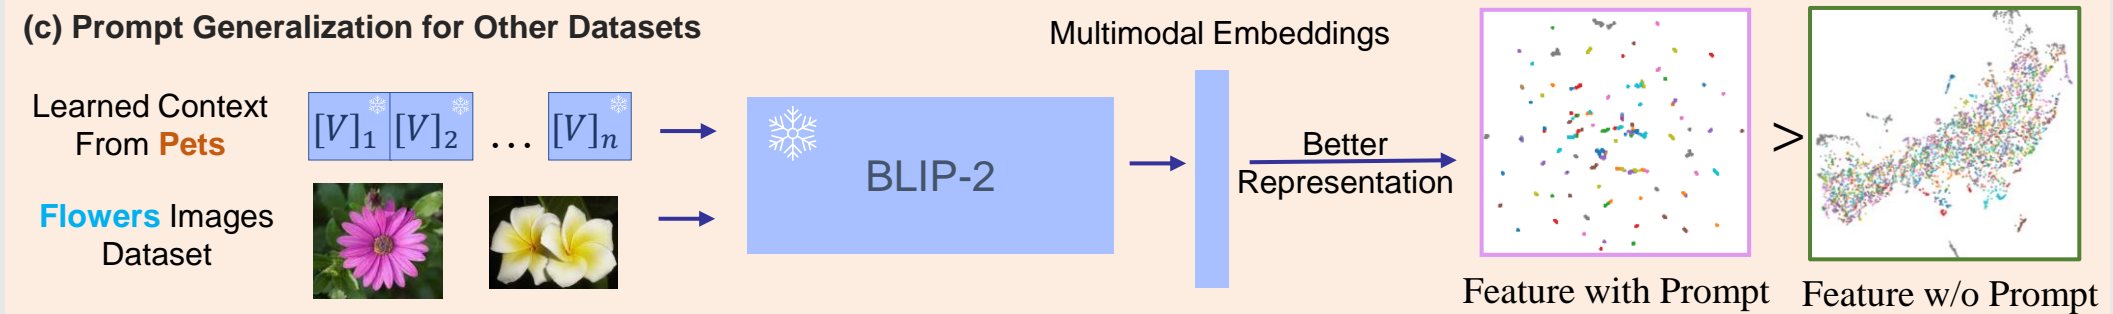

- ❑ Learned prompt from a single dataset can be **directly** applied to enhance the feature quality of other datasets



# Experiments

## ☐ Downstream task

- Image classification - linear probe on CLIP image encoders

## ☐ Datasets

- EuroSAT
- OxfordPets
- DTD
- Caltech101
- FGVAircraft
- UCF101
- Flowers102

## ▪ Domain generalization task

- K-Nearest Neighbors classifier on extracted feature

# Linear Probe Results of CLIP

|                  | Method            | EuroSAT              | OxfordPets           | DTD                  | Caltech101           | FGVCAircraft         | UCF101               | Flowers102           | Average      |
|------------------|-------------------|----------------------|----------------------|----------------------|----------------------|----------------------|----------------------|----------------------|--------------|
| RN50             | Random            | 0.221 ± 0.055        | 0.193 ± 0.032        | 0.202 ± 0.016        | 0.336 ± 0.021        | 0.057 ± 0.009        | 0.113 ± 0.012        | 0.121 ± 0.015        | 0.178        |
|                  | USL-I             | 0.309 ± 0.052        | 0.161 ± 0.020        | 0.188 ± 0.028        | 0.297 ± 0.008        | 0.048 ± 0.008        | 0.133 ± 0.013        | 0.104 ± 0.043        | 0.177        |
|                  | USL-M             | 0.289 ± 0.044        | 0.191 ± 0.038        | 0.185 ± 0.030        | 0.286 ± 0.008        | 0.064 ± 0.010        | 0.108 ± 0.027        | 0.130 ± 0.026        | 0.179        |
|                  | Ours $f(\cdot)$   | 0.456 ± 0.040        | <b>0.229 ± 0.002</b> | 0.283 ± 0.011        | 0.324 ± 0.001        | 0.066 ± 0.001        | 0.184 ± 0.010        | <b>0.137 ± 0.003</b> | 0.240        |
|                  | Ours $g_I(\cdot)$ | 0.469 ± 0.038        | 0.214 ± 0.007        | 0.282 ± 0.007        | 0.324 ± 0.001        | 0.074 ± 0.012        | 0.179 ± 0.009        | 0.136 ± 0.003        | 0.240        |
|                  | Ours $g_C(\cdot)$ | <b>0.487 ± 0.001</b> | 0.204 ± 0.013        | <b>0.283 ± 0.007</b> | <b>0.353 ± 0.002</b> | <b>0.076 ± 0.004</b> | <b>0.205 ± 0.006</b> | 0.130 ± 0.001        | <b>0.248</b> |
| RN101            | Random            | 0.217 ± 0.062        | 0.193 ± 0.021        | 0.139 ± 0.026        | 0.274 ± 0.023        | 0.042 ± 0.013        | 0.093 ± 0.014        | 0.116 ± 0.040        | 0.153        |
|                  | USL-I             | 0.257 ± 0.038        | 0.149 ± 0.019        | 0.145 ± 0.049        | 0.263 ± 0.012        | 0.042 ± 0.006        | 0.101 ± 0.017        | 0.090 ± 0.042        | 0.150        |
|                  | USL-M             | 0.209 ± 0.030        | 0.190 ± 0.052        | 0.144 ± 0.035        | 0.257 ± 0.010        | 0.058 ± 0.013        | 0.072 ± 0.037        | 0.111 ± 0.026        | 0.149        |
|                  | Ours $f(\cdot)$   | 0.350 ± 0.051        | <b>0.211 ± 0.004</b> | 0.250 ± 0.017        | 0.298 ± 0.001        | 0.056 ± 0.003        | 0.146 ± 0.013        | 0.133 ± 0.005        | 0.206        |
|                  | Ours $g_I(\cdot)$ | 0.408 ± 0.024        | 0.197 ± 0.011        | 0.245 ± 0.018        | 0.294 ± 0.006        | 0.070 ± 0.012        | 0.145 ± 0.010        | <b>0.133 ± 0.002</b> | 0.213        |
|                  | Ours $g_C(\cdot)$ | <b>0.423 ± 0.007</b> | 0.177 ± 0.012        | <b>0.260 ± 0.010</b> | <b>0.312 ± 0.002</b> | <b>0.067 ± 0.006</b> | <b>0.190 ± 0.015</b> | 0.120 ± 0.001        | <b>0.221</b> |
| ViTB32           | Random            | 0.332 ± 0.044        | 0.340 ± 0.024        | 0.286 ± 0.049        | 0.371 ± 0.014        | 0.071 ± 0.015        | 0.150 ± 0.013        | 0.175 ± 0.024        | 0.246        |
|                  | USL-I             | 0.422 ± 0.096        | 0.299 ± 0.038        | 0.275 ± 0.028        | 0.318 ± 0.006        | 0.074 ± 0.006        | 0.164 ± 0.020        | 0.179 ± 0.036        | 0.247        |
|                  | USL-M             | 0.412 ± 0.077        | 0.365 ± 0.033        | 0.290 ± 0.034        | 0.310 ± 0.010        | 0.091 ± 0.008        | 0.132 ± 0.035        | 0.188 ± 0.025        | 0.255        |
|                  | Ours $f(\cdot)$   | 0.525 ± 0.010        | <b>0.439 ± 0.011</b> | 0.372 ± 0.002        | 0.352 ± 0.002        | 0.089 ± 0.001        | 0.214 ± 0.011        | 0.188 ± 0.008        | 0.311        |
|                  | Ours $g_I(\cdot)$ | 0.557 ± 0.006        | 0.429 ± 0.019        | 0.379 ± 0.002        | 0.355 ± 0.005        | 0.094 ± 0.013        | 0.207 ± 0.013        | 0.186 ± 0.006        | 0.315        |
|                  | Ours $g_C(\cdot)$ | <b>0.584 ± 0.013</b> | 0.380 ± 0.020        | <b>0.385 ± 0.007</b> | <b>0.392 ± 0.002</b> | <b>0.098 ± 0.006</b> | <b>0.234 ± 0.010</b> | <b>0.217 ± 0.003</b> | <b>0.327</b> |
| ViTH14           | Random            | 0.482 ± 0.099        | 0.404 ± 0.042        | 0.278 ± 0.034        | 0.330 ± 0.016        | 0.118 ± 0.025        | 0.174 ± 0.024        | 0.229 ± 0.031        | 0.288        |
|                  | USL-I             | 0.504 ± 0.103        | 0.359 ± 0.035        | 0.284 ± 0.035        | 0.298 ± 0.016        | 0.108 ± 0.010        | 0.206 ± 0.022        | 0.227 ± 0.024        | 0.284        |
|                  | USL-M             | 0.505 ± 0.070        | 0.434 ± 0.029        | 0.304 ± 0.037        | 0.301 ± 0.015        | 0.128 ± 0.013        | 0.180 ± 0.036        | 0.221 ± 0.018        | 0.296        |
|                  | Ours $f(\cdot)$   | 0.577 ± 0.011        | <b>0.567 ± 0.005</b> | 0.392 ± 0.003        | 0.335 ± 0.001        | 0.116 ± 0.001        | 0.253 ± 0.017        | 0.206 ± 0.000        | 0.349        |
|                  | Ours $g_I(\cdot)$ | 0.596 ± 0.007        | 0.548 ± 0.025        | 0.394 ± 0.003        | 0.332 ± 0.003        | 0.131 ± 0.020        | 0.247 ± 0.005        | 0.203 ± 0.001        | 0.350        |
|                  | Ours $g_C(\cdot)$ | <b>0.634 ± 0.014</b> | 0.477 ± 0.021        | <b>0.403 ± 0.009</b> | <b>0.371 ± 0.005</b> | <b>0.143 ± 0.003</b> | <b>0.287 ± 0.010</b> | <b>0.241 ± 0.001</b> | <b>0.365</b> |
| ViTG14           | Random            | 0.402 ± 0.045        | 0.421 ± 0.027        | 0.305 ± 0.033        | 0.334 ± 0.022        | 0.109 ± 0.014        | 0.198 ± 0.035        | 0.216 ± 0.032        | 0.284        |
|                  | USL-I             | 0.499 ± 0.106        | 0.383 ± 0.029        | 0.285 ± 0.033        | 0.302 ± 0.013        | 0.113 ± 0.014        | 0.208 ± 0.019        | 0.243 ± 0.026        | 0.290        |
|                  | USL-M             | 0.481 ± 0.087        | 0.461 ± 0.026        | 0.305 ± 0.038        | 0.298 ± 0.017        | 0.133 ± 0.013        | 0.184 ± 0.040        | 0.238 ± 0.024        | 0.300        |
|                  | Ours $f(\cdot)$   | 0.560 ± 0.024        | <b>0.582 ± 0.008</b> | 0.389 ± 0.004        | 0.339 ± 0.002        | 0.130 ± 0.005        | 0.254 ± 0.014        | 0.224 ± 0.002        | 0.354        |
|                  | Ours $g_I(\cdot)$ | 0.598 ± 0.004        | 0.566 ± 0.023        | 0.388 ± 0.006        | 0.336 ± 0.001        | 0.145 ± 0.021        | 0.252 ± 0.003        | 0.216 ± 0.004        | 0.357        |
|                  | Ours $g_C(\cdot)$ | <b>0.609 ± 0.019</b> | 0.503 ± 0.017        | <b>0.402 ± 0.005</b> | <b>0.376 ± 0.004</b> | <b>0.161 ± 0.005</b> | <b>0.289 ± 0.015</b> | <b>0.258 ± 0.002</b> | <b>0.371</b> |
| Zero Shot BLIP-2 |                   | 0.111 (0.100)        | 0.081 (0.027)        | 0.123 (0.021)        | 0.379 (0.010)        | 0.113 (0.010)        | 0.070 (0.010)        | 0.114 (0.010)        | 0.141        |

UP-DP outperforms  
the SOTA Methods

□  $f(\cdot), g_I(\cdot), g_C(\cdot)$   
represents different  
sampling strategies

# Domain Generalization Results of Learned Prompts

| Features            | Caltech101   | DTD          | FGVCAircraft | Flowers102   | OxfordPets   | UCF101       | EuroSAT      | Average      |
|---------------------|--------------|--------------|--------------|--------------|--------------|--------------|--------------|--------------|
| Caltech101_Prompt   | 0.975        | 0.768        | 0.485        | 0.987        | 0.922        | <b>0.885</b> | 0.957        | 0.834        |
| DTD_Prompt          | <b>0.979</b> | <b>0.809</b> | 0.482        | 0.990        | 0.889        | 0.878        | 0.964        | 0.836        |
| FGVCAircraft_Prompt | 0.974        | 0.768        | 0.518        | 0.986        | 0.852        | 0.862        | 0.963        | 0.829        |
| Flowers102_Prompt   | 0.978        | 0.806        | <b>0.583</b> | <b>0.995</b> | <b>0.946</b> | 0.876        | 0.952        | <b>0.864</b> |
| OxfordPets_Prompt   | 0.976        | 0.746        | 0.520        | 0.989        | 0.945        | 0.871        | 0.960        | 0.840        |
| UCF101_Prompt       | 0.970        | 0.766        | 0.423        | 0.978        | 0.786        | 0.863        | 0.962        | 0.795        |
| EuroSAT_Prompt      | 0.955        | 0.794        | 0.415        | 0.975        | 0.501        | 0.865        | <b>0.969</b> | 0.746        |
| Empty_Prompt        | 0.756        | 0.501        | 0.322        | 0.719        | 0.492        | 0.744        | 0.933        | 0.606        |
| Initi_Prompt        | 0.771        | 0.534        | 0.270        | 0.757        | 0.421        | 0.779        | 0.919        | 0.592        |
| Image               | 0.974        | 0.763        | 0.349        | 0.984        | 0.681        | 0.875        | 0.961        | 0.760        |

Learned Prompt can be generalized  
across different datasets

# Visualization of Features and Cluster Assignments

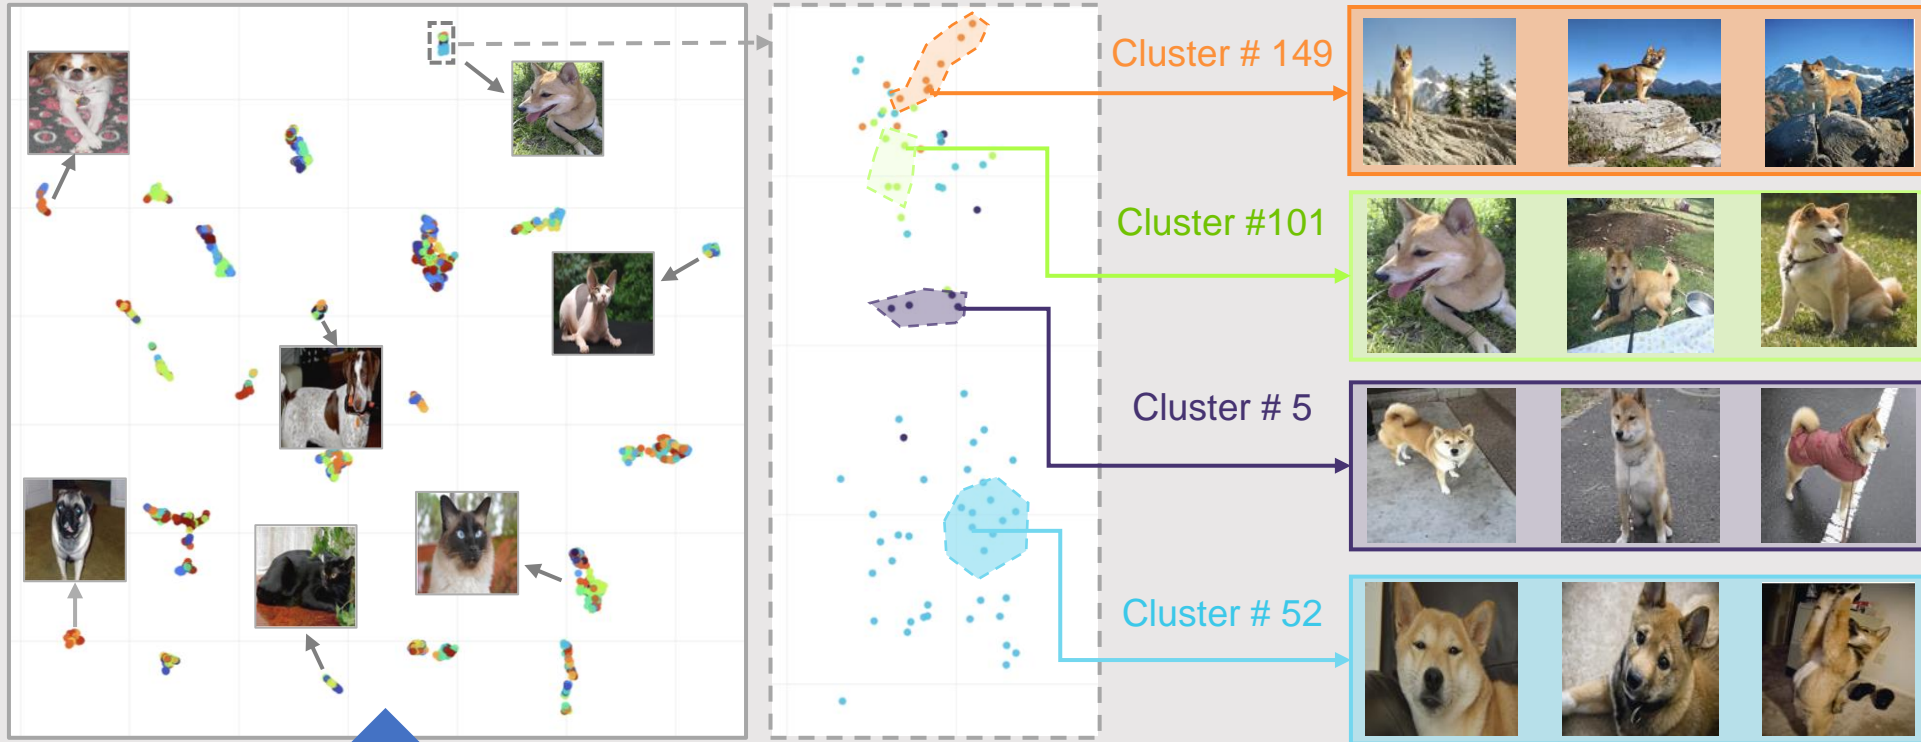

High level feature can distinguish between various types of pets

Cluster levels feature can capture more detailed information i.e., background and postures

# Interpreting the Learned Prompts

| EuroSAT     | OxfordPets     | DTD        | Caltech101 | FGVCAircraft | UCF101   | Flowers102       |
|-------------|----------------|------------|------------|--------------|----------|------------------|
| makes       | shark          | several    | learn      | diamond      | healthy  | learn            |
| <b>wood</b> | brigham        | learn      | butterfly  | offers       | learn    | <b>butterfly</b> |
| takes       | <b>saint</b>   | putting    | saint      | learn        | attends  | angel            |
| healthy     | laying         | <b>add</b> | <b>add</b> | <b>plane</b> | performs | <b>saint</b>     |
| ku          | elegant        | six        | three      | del          | speaks   | personality      |
| single      | chicken        | three      | 2020       | river        | newly    | picking          |
| <b>have</b> | posing         | q          | 2019       | <b>100</b>   | physical | <b>adding</b>    |
| november    | kate           | vector     | 2000       | <b>40</b>    | provides | gold             |
| holds       | bee            | che        | speaks     | <b>have</b>  | choose   | <b>spider</b>    |
| holding     | <b>attends</b> | some       | with       | get          | serves   | giant            |

A few **words** is related to their respective task

Some shared **words** may lead to generalization

Majority of the words lack coherent meaning: Prompt encode meanings beyond the scope of the existing vocabulary



# Ablation Study

## Context Length

|        | Context Length | EuroSAT                             | OxfordPets                          | DTD                                 | Caltech101                          | FGVCAircraft                        | UCF101                              | Flowers102                          | Average      |
|--------|----------------|-------------------------------------|-------------------------------------|-------------------------------------|-------------------------------------|-------------------------------------|-------------------------------------|-------------------------------------|--------------|
| RN50   | 16             | $0.359 \pm 0.037$                   | $0.207 \pm 0.006$                   | $0.246 \pm 0.022$                   | $0.312 \pm 0.002$                   | $0.058 \pm 0.009$                   | $0.181 \pm 0.014$                   | $0.104 \pm 0.015$                   | 0.210        |
|        | 4              | <b><math>0.456 \pm 0.040</math></b> | <b><math>0.229 \pm 0.002</math></b> | <b><math>0.283 \pm 0.011</math></b> | <b><math>0.324 \pm 0.001</math></b> | <b><math>0.066 \pm 0.001</math></b> | <b><math>0.184 \pm 0.010</math></b> | <b><math>0.137 \pm 0.003</math></b> | <b>0.240</b> |
| RN101  | 16             | $0.335 \pm 0.035$                   | $0.188 \pm 0.017$                   | $0.226 \pm 0.025$                   | $0.286 \pm 0.003$                   | $0.049 \pm 0.015$                   | $0.132 \pm 0.012$                   | $0.087 \pm 0.015$                   | 0.186        |
|        | 4              | <b><math>0.350 \pm 0.051</math></b> | <b><math>0.211 \pm 0.004</math></b> | <b><math>0.250 \pm 0.017</math></b> | <b><math>0.298 \pm 0.001</math></b> | <b><math>0.056 \pm 0.003</math></b> | <b><math>0.146 \pm 0.013</math></b> | <b><math>0.133 \pm 0.005</math></b> | <b>0.206</b> |
| ViTB32 | 16             | $0.462 \pm 0.006$                   | $0.400 \pm 0.023$                   | $0.320 \pm 0.014$                   | $0.336 \pm 0.007$                   | $0.077 \pm 0.010$                   | $0.212 \pm 0.019$                   | $0.185 \pm 0.013$                   | 0.285        |
|        | 4              | <b><math>0.525 \pm 0.010</math></b> | <b><math>0.439 \pm 0.011</math></b> | <b><math>0.372 \pm 0.002</math></b> | <b><math>0.352 \pm 0.002</math></b> | <b><math>0.089 \pm 0.001</math></b> | <b><math>0.214 \pm 0.011</math></b> | <b><math>0.188 \pm 0.008</math></b> | <b>0.311</b> |
| ViTH14 | 16             | $0.494 \pm 0.007$                   | $0.478 \pm 0.018$                   | $0.348 \pm 0.011$                   | $0.318 \pm 0.004$                   | $0.101 \pm 0.010$                   | $0.249 \pm 0.018$                   | $0.200 \pm 0.011$                   | 0.313        |
|        | 4              | <b><math>0.577 \pm 0.011</math></b> | <b><math>0.567 \pm 0.005</math></b> | <b><math>0.392 \pm 0.003</math></b> | <b><math>0.335 \pm 0.001</math></b> | <b><math>0.116 \pm 0.001</math></b> | <b><math>0.253 \pm 0.017</math></b> | <b><math>0.206 \pm 0.000</math></b> | <b>0.349</b> |
| ViTG14 | 16             | $0.501 \pm 0.006$                   | $0.507 \pm 0.015$                   | $0.352 \pm 0.009$                   | $0.324 \pm 0.007$                   | $0.108 \pm 0.009$                   | $0.251 \pm 0.019$                   | $0.210 \pm 0.010$                   | 0.322        |
|        | 4              | <b><math>0.560 \pm 0.024</math></b> | <b><math>0.582 \pm 0.008</math></b> | <b><math>0.389 \pm 0.004</math></b> | <b><math>0.339 \pm 0.002</math></b> | <b><math>0.130 \pm 0.005</math></b> | <b><math>0.254 \pm 0.014</math></b> | <b><math>0.224 \pm 0.002</math></b> | <b>0.354</b> |

Short context length is better  
Long context length may cause overfitting

# Ablation Study

## Annotation Budget

|        | Method | EuroSAT                             | OxfordPets                          | DTD                                 | Caltech101                          | FGVCAircraft                        | UCF101                              | Flowers102                          | Average      |
|--------|--------|-------------------------------------|-------------------------------------|-------------------------------------|-------------------------------------|-------------------------------------|-------------------------------------|-------------------------------------|--------------|
| RN50   | Random | 0.323 $\pm$ 0.069                   | 0.292 $\pm$ 0.023                   | 0.270 $\pm$ 0.008                   | 0.362 $\pm$ 0.010                   | 0.062 $\pm$ 0.005                   | 0.175 $\pm$ 0.041                   | 0.151 $\pm$ 0.011                   | 0.234        |
|        | USL-I  | 0.389 $\pm$ 0.042                   | 0.234 $\pm$ 0.041                   | 0.257 $\pm$ 0.017                   | 0.349 $\pm$ 0.013                   | 0.070 $\pm$ 0.007                   | 0.188 $\pm$ 0.014                   | 0.153 $\pm$ 0.026                   | 0.234        |
|        | USL-M  | 0.386 $\pm$ 0.047                   | 0.298 $\pm$ 0.032                   | 0.269 $\pm$ 0.043                   | 0.340 $\pm$ 0.021                   | 0.075 $\pm$ 0.012                   | 0.188 $\pm$ 0.009                   | 0.133 $\pm$ 0.031                   | 0.241        |
|        | Ours   | <b>0.398 <math>\pm</math> 0.010</b> | <b>0.307 <math>\pm</math> 0.007</b> | <b>0.342 <math>\pm</math> 0.010</b> | <b>0.399 <math>\pm</math> 0.005</b> | <b>0.084 <math>\pm</math> 0.001</b> | <b>0.245 <math>\pm</math> 0.006</b> | <b>0.187 <math>\pm</math> 0.007</b> | <b>0.280</b> |
| RN101  | Random | 0.291 $\pm$ 0.049                   | 0.251 $\pm$ 0.028                   | 0.216 $\pm$ 0.031                   | 0.319 $\pm$ 0.016                   | 0.058 $\pm$ 0.012                   | 0.142 $\pm$ 0.028                   | 0.136 $\pm$ 0.018                   | 0.202        |
|        | USL-I  | 0.325 $\pm$ 0.047                   | 0.225 $\pm$ 0.047                   | 0.205 $\pm$ 0.027                   | 0.291 $\pm$ 0.012                   | 0.066 $\pm$ 0.011                   | 0.144 $\pm$ 0.014                   | 0.124 $\pm$ 0.028                   | 0.197        |
|        | USL-M  | 0.319 $\pm$ 0.062                   | <b>0.298 <math>\pm</math> 0.047</b> | 0.213 $\pm$ 0.031                   | 0.294 $\pm$ 0.018                   | 0.064 $\pm$ 0.018                   | 0.149 $\pm$ 0.017                   | 0.109 $\pm$ 0.026                   | 0.207        |
|        | Ours   | <b>0.325 <math>\pm</math> 0.000</b> | 0.294 $\pm$ 0.005                   | <b>0.305 <math>\pm</math> 0.010</b> | <b>0.345 <math>\pm</math> 0.004</b> | <b>0.077 <math>\pm</math> 0.000</b> | <b>0.224 <math>\pm</math> 0.005</b> | <b>0.159 <math>\pm</math> 0.005</b> | <b>0.247</b> |
| ViTB32 | Random | 0.438 $\pm$ 0.066                   | 0.488 $\pm$ 0.070                   | 0.400 $\pm$ 0.024                   | 0.427 $\pm$ 0.019                   | 0.085 $\pm$ 0.007                   | 0.201 $\pm$ 0.011                   | 0.270 $\pm$ 0.040                   | 0.330        |
|        | USL-I  | 0.496 $\pm$ 0.039                   | 0.438 $\pm$ 0.030                   | 0.377 $\pm$ 0.017                   | 0.393 $\pm$ 0.017                   | 0.097 $\pm$ 0.010                   | 0.223 $\pm$ 0.023                   | 0.263 $\pm$ 0.028                   | 0.327        |
|        | USL-M  | <b>0.552 <math>\pm</math> 0.054</b> | <b>0.524 <math>\pm</math> 0.034</b> | 0.409 $\pm$ 0.016                   | 0.390 $\pm$ 0.021                   | 0.102 $\pm$ 0.020                   | 0.223 $\pm$ 0.011                   | 0.237 $\pm$ 0.035                   | 0.348        |
|        | Ours   | 0.541 $\pm$ 0.006                   | 0.488 $\pm$ 0.019                   | <b>0.427 <math>\pm</math> 0.001</b> | <b>0.448 <math>\pm</math> 0.004</b> | <b>0.104 <math>\pm</math> 0.004</b> | <b>0.274 <math>\pm</math> 0.003</b> | <b>0.309 <math>\pm</math> 0.001</b> | <b>0.370</b> |
| ViTH14 | Random | 0.505 $\pm$ 0.110                   | 0.560 $\pm$ 0.029                   | 0.421 $\pm$ 0.024                   | 0.425 $\pm$ 0.009                   | 0.152 $\pm$ 0.012                   | 0.282 $\pm$ 0.027                   | 0.290 $\pm$ 0.038                   | 0.376        |
|        | USL-I  | 0.585 $\pm$ 0.052                   | 0.518 $\pm$ 0.036                   | 0.408 $\pm$ 0.017                   | 0.369 $\pm$ 0.015                   | 0.147 $\pm$ 0.011                   | 0.301 $\pm$ 0.026                   | 0.313 $\pm$ 0.040                   | 0.377        |
|        | USL-M  | <b>0.647 <math>\pm</math> 0.057</b> | <b>0.629 <math>\pm</math> 0.032</b> | 0.435 $\pm$ 0.020                   | 0.372 $\pm$ 0.025                   | 0.160 $\pm$ 0.027                   | 0.292 $\pm$ 0.008                   | 0.294 $\pm$ 0.039                   | 0.404        |
|        | Ours   | 0.615 $\pm$ 0.028                   | 0.600 $\pm$ 0.018                   | <b>0.446 <math>\pm</math> 0.005</b> | <b>0.435 <math>\pm</math> 0.006</b> | <b>0.148 <math>\pm</math> 0.009</b> | <b>0.323 <math>\pm</math> 0.008</b> | <b>0.327 <math>\pm</math> 0.001</b> | <b>0.413</b> |
| ViTG14 | Random | 0.567 $\pm$ 0.062                   | 0.592 $\pm$ 0.039                   | 0.440 $\pm$ 0.026                   | 0.413 $\pm$ 0.008                   | 0.165 $\pm$ 0.026                   | 0.279 $\pm$ 0.023                   | 0.341 $\pm$ 0.023                   | 0.400        |
|        | USL-I  | 0.578 $\pm$ 0.044                   | 0.546 $\pm$ 0.032                   | 0.411 $\pm$ 0.017                   | 0.372 $\pm$ 0.019                   | 0.157 $\pm$ 0.010                   | 0.312 $\pm$ 0.025                   | 0.336 $\pm$ 0.037                   | 0.387        |
|        | USL-M  | <b>0.627 <math>\pm</math> 0.052</b> | <b>0.658 <math>\pm</math> 0.031</b> | 0.436 $\pm$ 0.017                   | 0.371 $\pm$ 0.023                   | <b>0.171 <math>\pm</math> 0.023</b> | 0.303 $\pm$ 0.004                   | 0.316 $\pm$ 0.034                   | 0.412        |
|        | Ours   | 0.614 $\pm$ 0.007                   | 0.636 $\pm$ 0.014                   | <b>0.445 <math>\pm</math> 0.007</b> | <b>0.434 <math>\pm</math> 0.005</b> | 0.165 $\pm$ 0.011                   | <b>0.326 <math>\pm</math> 0.009</b> | <b>0.342 <math>\pm</math> 0.002</b> | <b>0.423</b> |

Our method still outperform others  
under larger annotation budget setting

# Visualization on Selected Samples

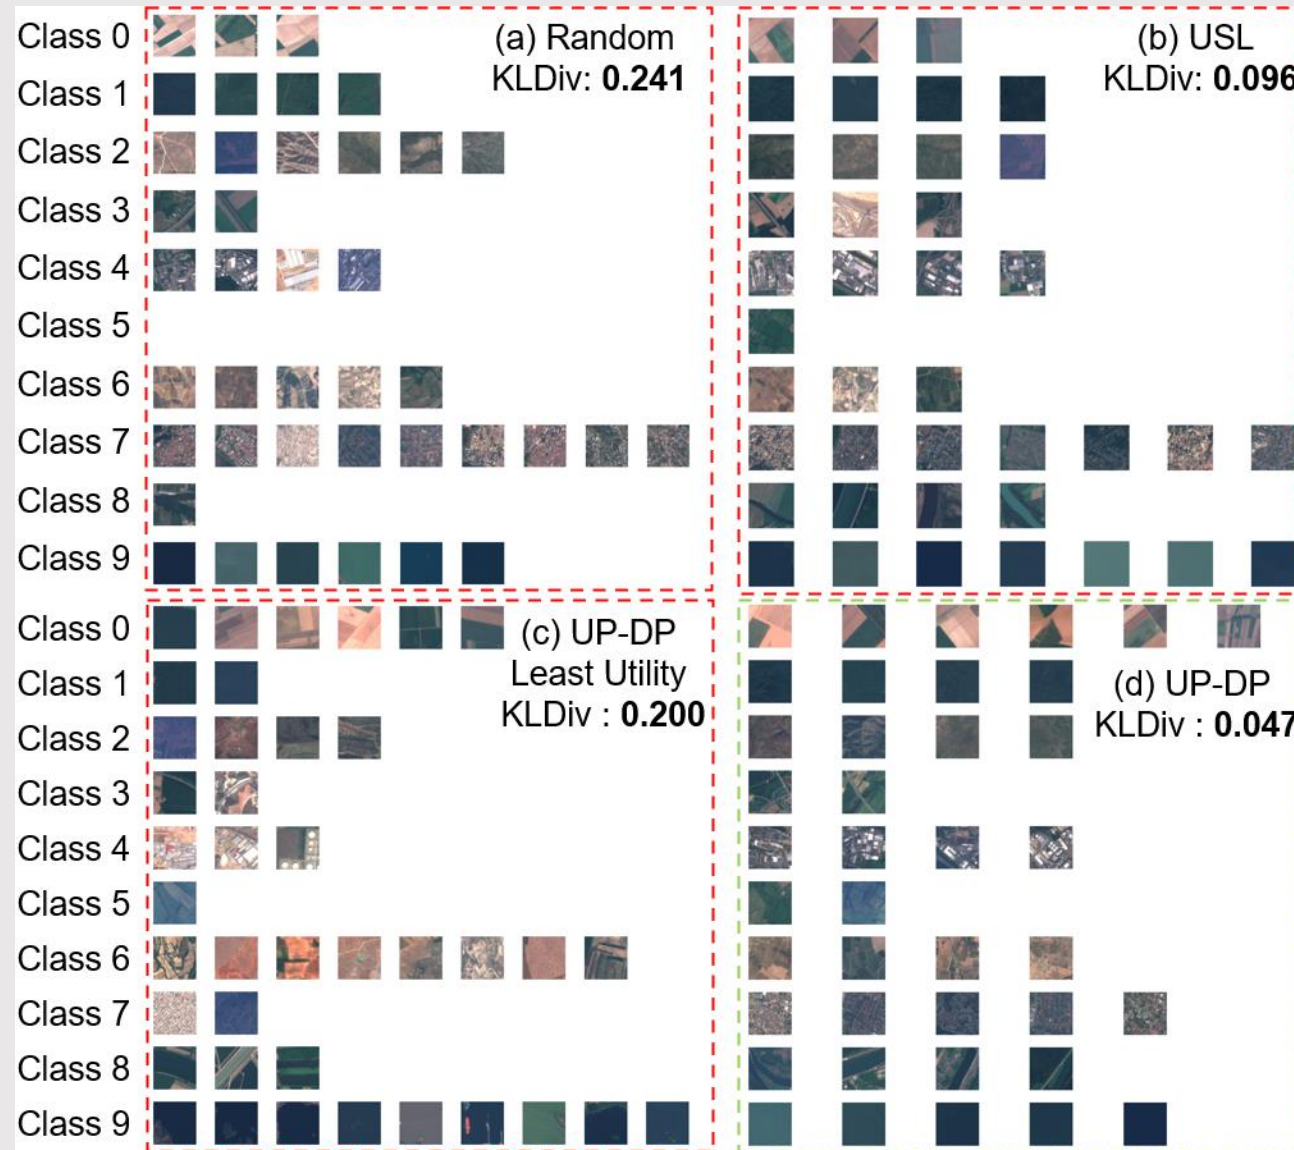

More balanced  
Selection



Thank you for reviewing!

# Back-up: Datasets Statistics

| Dataset      | Classes | Train  | Val   | Test  | Hand-crafted prompt                         |
|--------------|---------|--------|-------|-------|---------------------------------------------|
| EuroSAT      | 10      | 13,500 | 5,400 | 8,100 | “a centered satellite photo of [CLASS].”    |
| OxfordPets   | 37      | 2,944  | 736   | 3,669 | “a photo of a [CLASS], a type of pet.”      |
| DTD          | 47      | 2,820  | 1,128 | 1,692 | “[CLASS] texture.”                          |
| Caltech101   | 100     | 4,128  | 1,649 | 2,465 | “a photo of a [CLASS].”                     |
| FGVCAircraft | 100     | 3,334  | 3,333 | 3,333 | “a photo of a [CLASS], a type of aircraft.” |
| UCF101       | 101     | 7,639  | 1,898 | 3,783 | “a photo of a person doing [CLASS].”        |
| Flowers102   | 102     | 4,093  | 1,633 | 2,463 | “a photo of a [CLASS], a type of flower.”   |
